# Supplementary material
Source: Springer Nature journal article supplement (https://www.springermedizin.de/resource/supplementary/13023_2013_597_MOESM2_ESM.pdf/9642494)

**A. Subject 1**

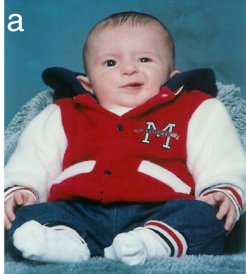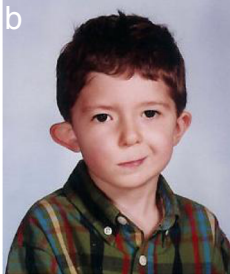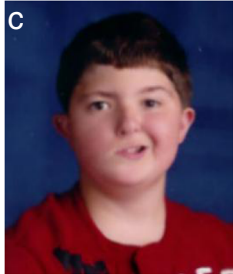

**B. Subject 2**

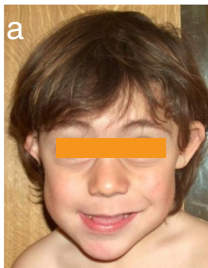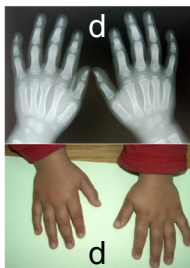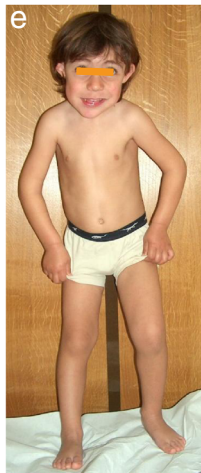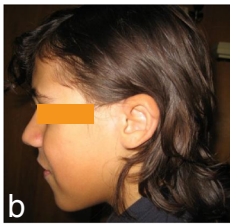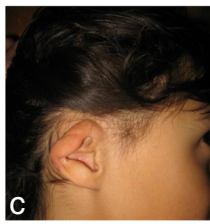

Supplement: MOESM2 [file 9642494]
